# Supplementary material for: One-pot synthesis of well-defined amphiphilic alternating copolymer brushes based on POSS and their self-assembly in aqueous solution
Source: Royal Society of Chemistry journal article supplement (doi:10.1039/c4ra15492d), 2015-01-01
Supplement: c4ra15492d1.pdf [file c4ra15492d1.pdf]

**Supporting Information**

**One-pot synthesis of well-defined amphiphilic alternating copolymer brushes based on POSS and their self-assembly behavior in aqueous solution**

Zhenghe Zhang, Lizhi Hong, Jinxia Li, Feng Liu, Haibo Cai, Yun Gao, Weian Zhang \*

*Shanghai Key Laboratory of Advanced Polymeric Materials, State Key Laboratory of Bioreactor Engineering, East China University of Science and Technology, 130 Meilong Road, Shanghai 200237, P. R. China*

\*Corresponding authors. Tel.: +86 21 64253033; Fax: +86 21 64253033.

Email: [wazhang@ecust.edu.cn](mailto:wazhang@ecust.edu.cn)

### Synthesis of cumyl dithiobenzoate (CDB)

CDB was prepared according to the literature <sup>1</sup>. <sup>1</sup>H NMR (ppm, CDCl<sub>3</sub>): 2.00 (s, 6H, CH<sub>3</sub>); 7.21 (t, 1H, ArH); 7.30 (m, 4H, ArH); 7.43 (t, 1H, ArH); 7.54 (d, 2H, ArH); 7.84 (d, 2H, ArH).

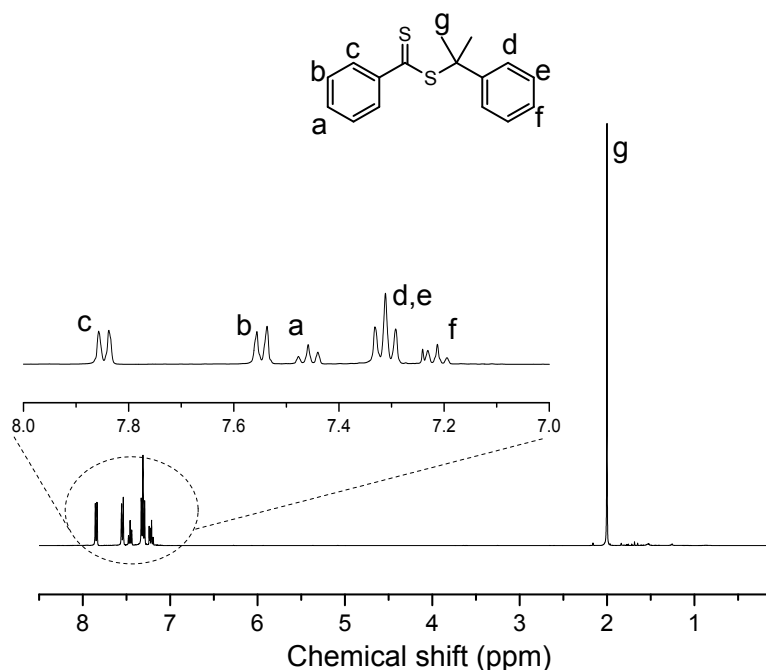

**Fig. S1.** The <sup>1</sup>H NMR spectrum of CDB in CDCl<sub>3</sub>.

### Synthesis of macromonomer (VBPEG)

The macromonomers VBDEG and VBPEG (550/1000/2000) were prepared according to the previous literatures <sup>2, 3</sup>. A typical procedure for the synthesis of VBPEG550 as following: methoxypolyethylene glycol ( $M_n = 550$  g/mol, 4.4 g, 8 mmol) was added into a schlenk flask containing toluene (50 mL), and the mixture was refluxed at 110 °C overnight. After toluene was removed by evaporation, THF (50 mL) and NaH (0.6 g, 25 mmol) were added under N<sub>2</sub>. After the mixture was stirred in an ice bath under N<sub>2</sub> for 1 h, 4-vinylbenzyl chloride (3.05 g, 20 mmol) in THF (20 mL) was added dropwise into above solution. The reaction was carried out at

room temperature for 24 h. Then THF was evaporated and brine (200 mL) was added into the residue. The aqueous phase was extracted with  $\text{CH}_2\text{Cl}_2$  (50 mL) four times, and the organic phase were dried over anhydrous  $\text{Na}_2\text{SO}_4$  overnight. The solvent was evaporated under reduced pressure and poured into freezing petroleum ether three times. VBDEG was purified by flash column chromatography on silica gel using ethyl acetate: petroleum ether (1:4 v/v). The product was dried at room temperature in a vacuum oven for 12 h.  $^1\text{H}$  NMR ( $\text{CDCl}_3$ , ppm): 7.36 (d, 2H, ArH); 7.28 (d, 2H, ArH); 6.69, 5.72, 5.21 (dd, 1H,  $\text{CH}_2=\text{CH}-$ ); 4.53 (s, 2H, Ar- $\text{CH}_2-$ ); 3.51-3.67 (m, 88H, - $\text{OCH}_2\text{CH}_2\text{O}-$ ), 3.35 (s, 3H, - $\text{CH}_3$ ).

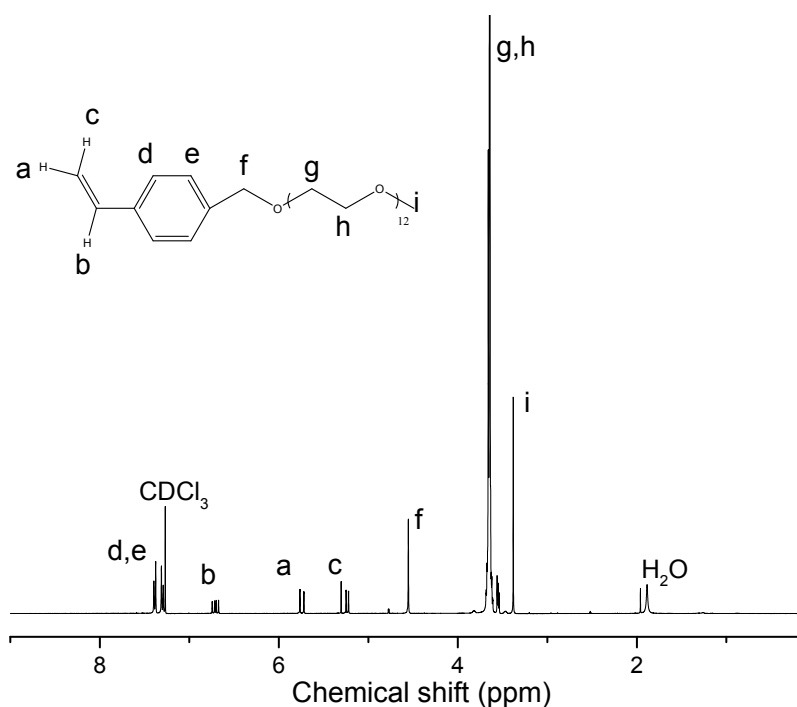

**Fig. S2.** The  $^1\text{H}$  NMR spectrum of macromonomer VBPEG550 in  $\text{CDCl}_3$ .

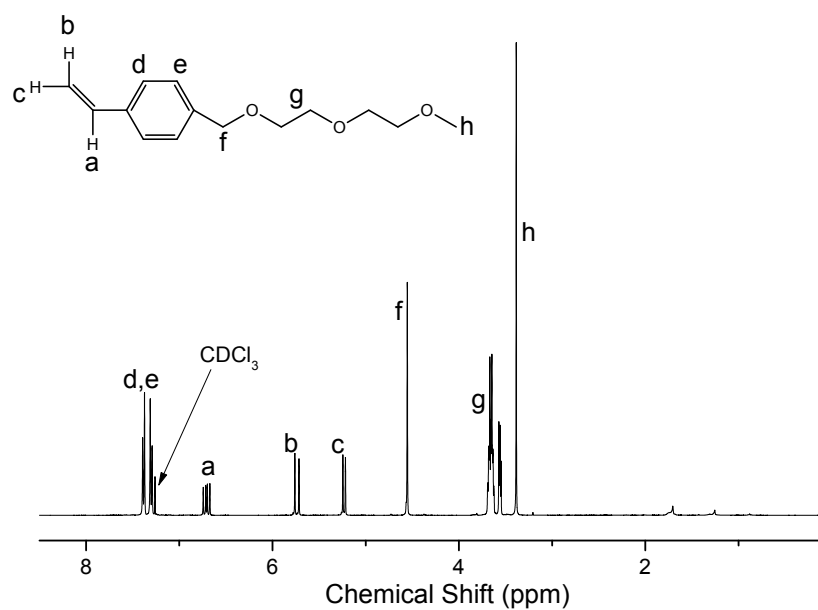

**Fig. S3.** The <sup>1</sup>H NMR spectrum of macromonomer VBDEG in CDCl<sub>3</sub>.

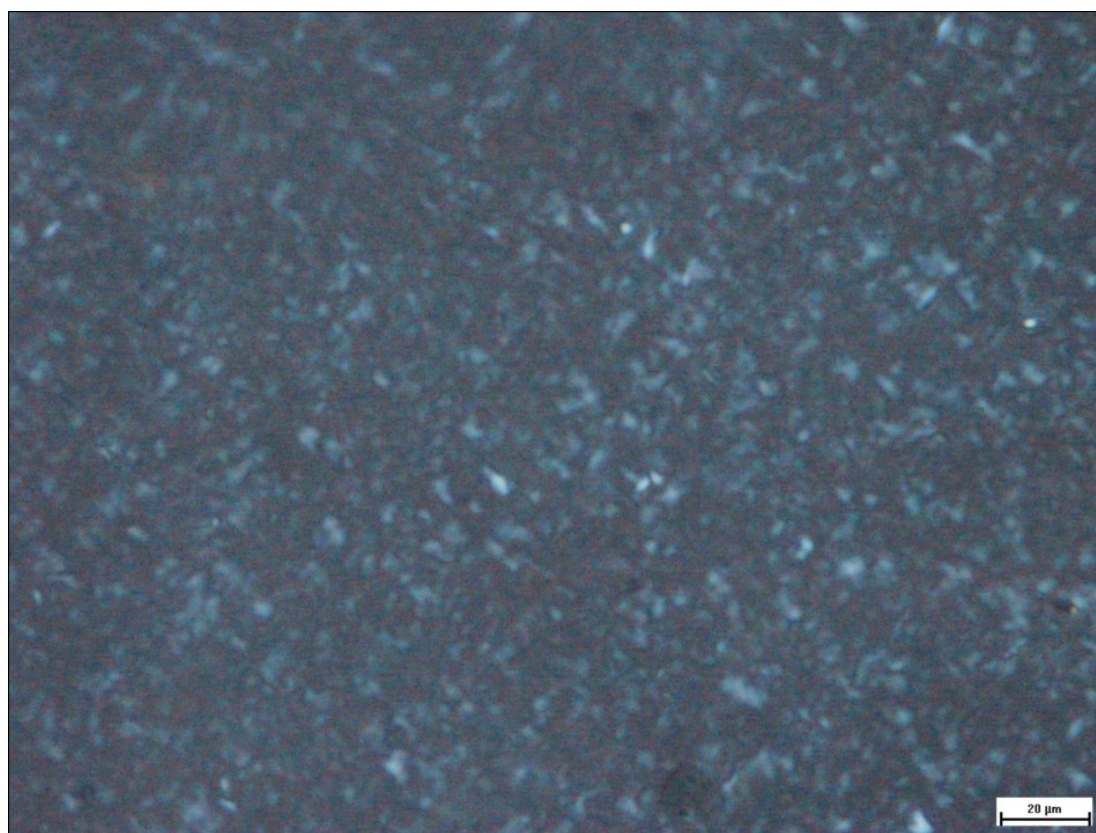

**Fig. S4.** POM image of P(MIPOSS-*alt*-VBPEG2000)<sub>16</sub> **2d** crystal. The sample was

prepared by thermal annealing at 160 °C for 30 min, and then cooled from 120 °C to 100 °C at the rate of 2 °C/ min.

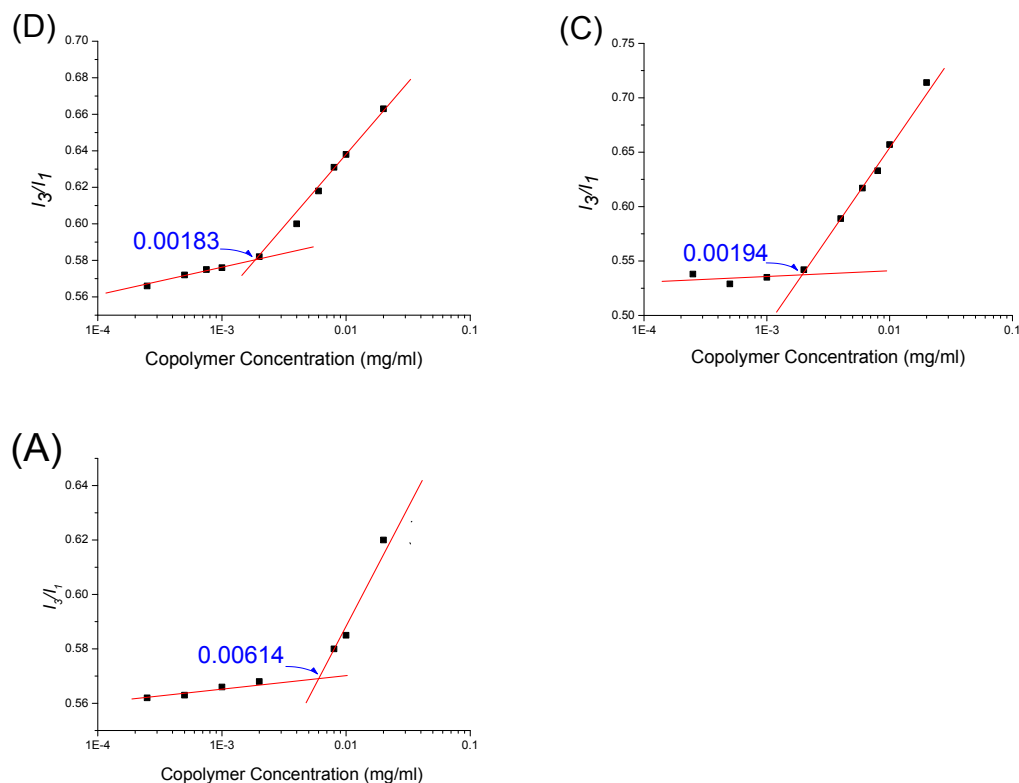

**Fig. S5.** Plots of the fluorescence intensity ratio  $I_3/I_1$  from pyrene with different concentration of P(MIPOSS-*alt*-VBPEG) in aqueous solution. (A) P(MIPOSS-*alt*-VBDEG)<sub>15</sub> **2a**, (C) P(MIPOSS-*alt*-VBPEG1000)<sub>17</sub> **2c**, and (D) P(MIPOSS-*alt*-VBPEG2000)<sub>16</sub> **2d**.

## References

1. Liu, Y.; He, J. P.; Xu, J. T.; Fan, D. Q.; Tang, W.; Yang, Y. L. *Macromolecules* **2005**, 38, (24), 10332-10335.
2. Zhu, H.; Deng, G.; Chen, Y. *Polymer* **2008**, 49, (2), 405-411.
3. Wilson, M. E.; Paech, K.; Zhou, W. J.; Kurth, M. J. *Journal of Organic Chemistry* **1998**, 63, (15), 5094-5099.
